# Supplementary material
Source: ML conference proceedings conference paper supplement (https://openreview.net/forum?id=HMzzPOLs9l5)

Real data samples

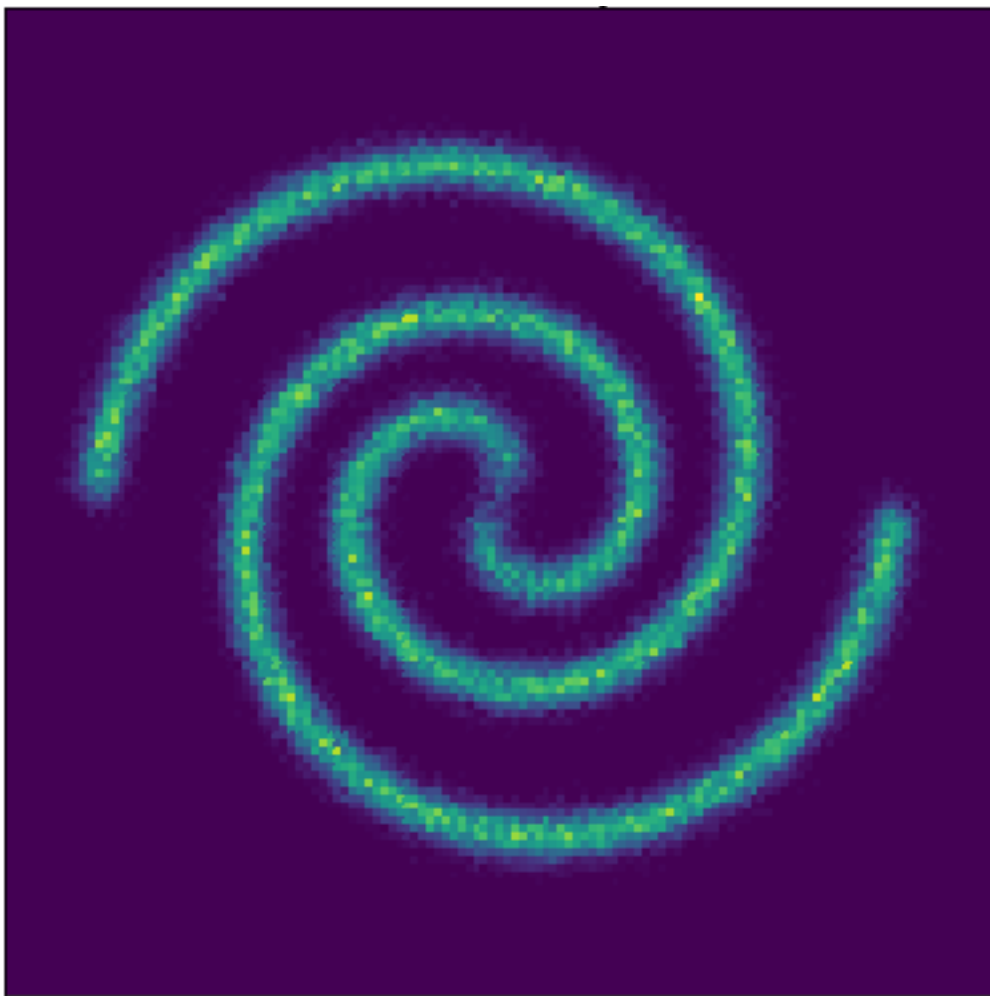

Uniform Categorical  
Discretization

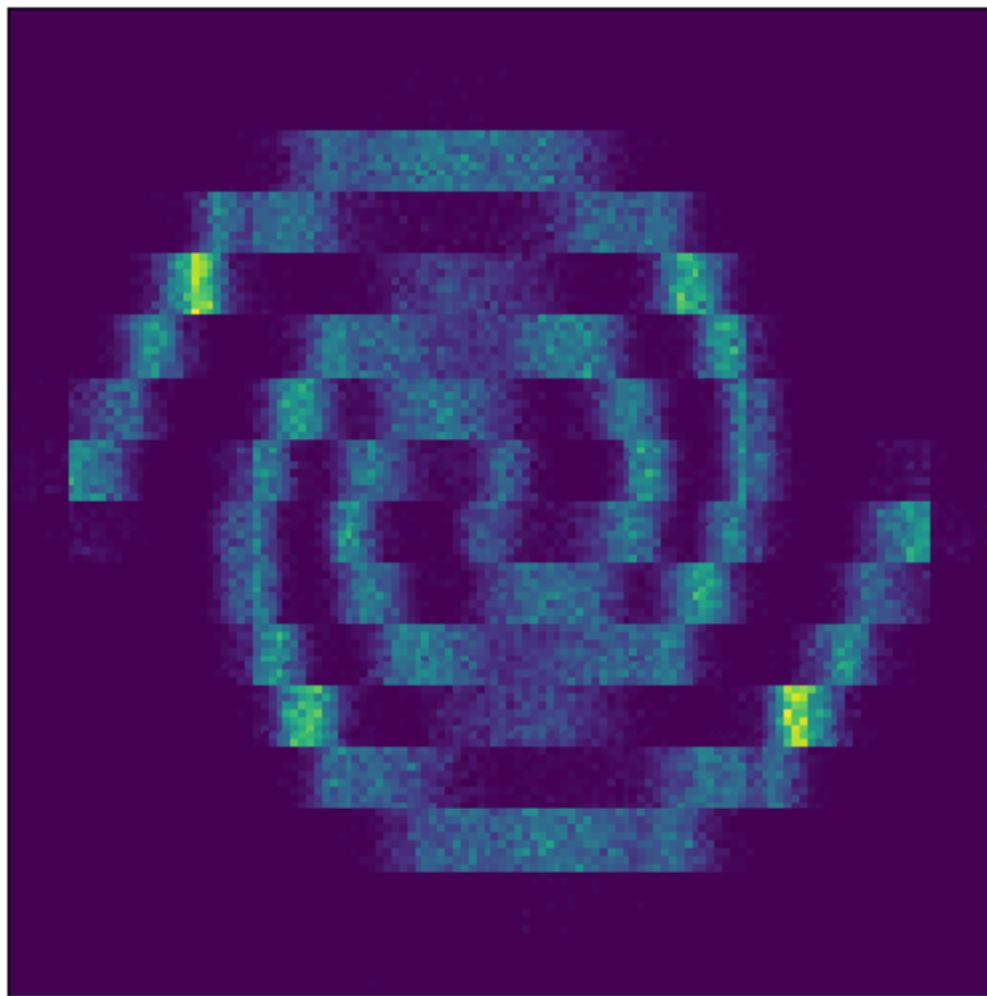

**Adaptive Categorical**  
Discretization (**AdaCat**)

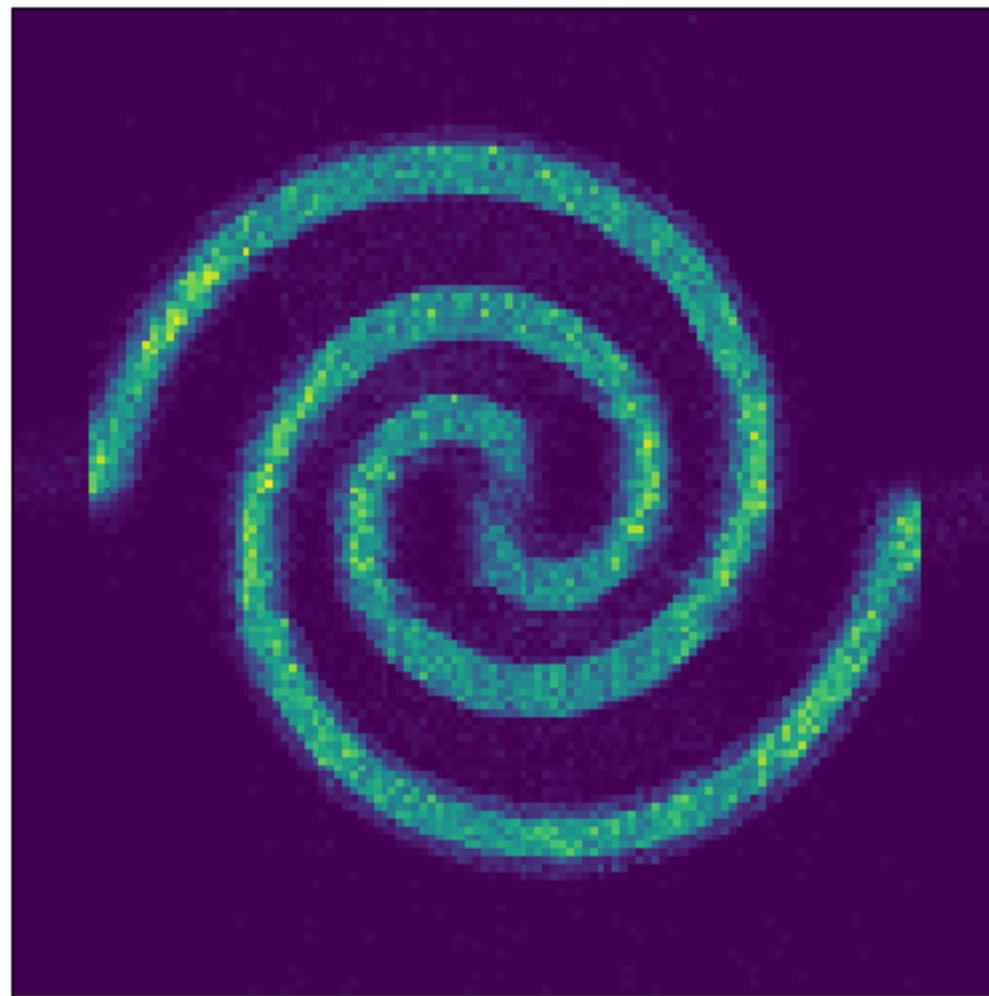

Supplement: supplementary_material [file attachment]
