# Supplementary material
Source: ML conference proceedings conference paper supplement (https://openreview.net/forum?id=HMzzPOLs9l5)

Target Distribution

AdaCat

Uniform discretization

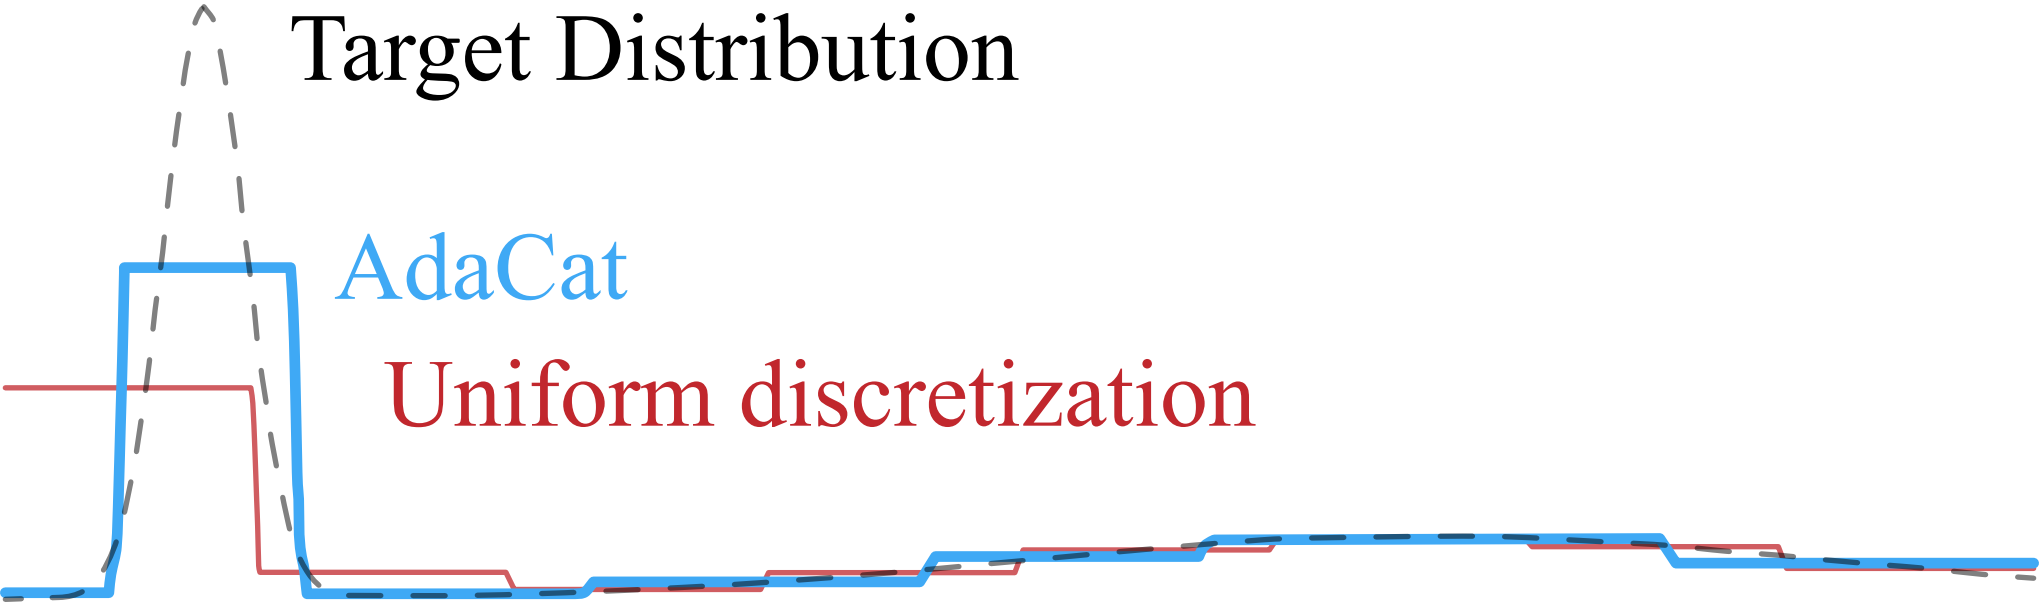

Supplement: supplementary_material [file attachment]

# Uniform Discretization

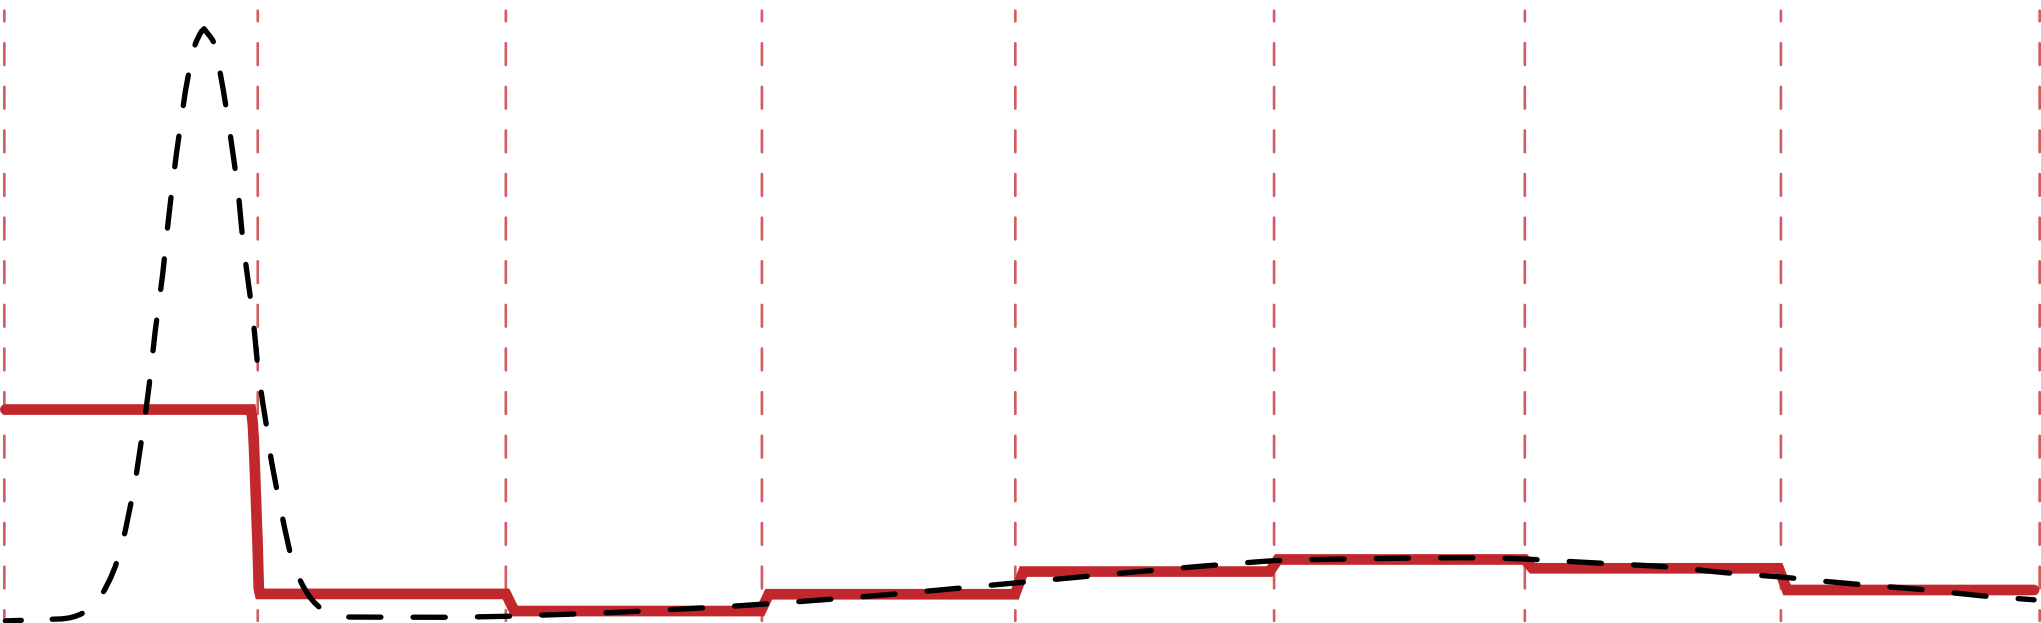

# Adaptive Discretization (AdaCat)

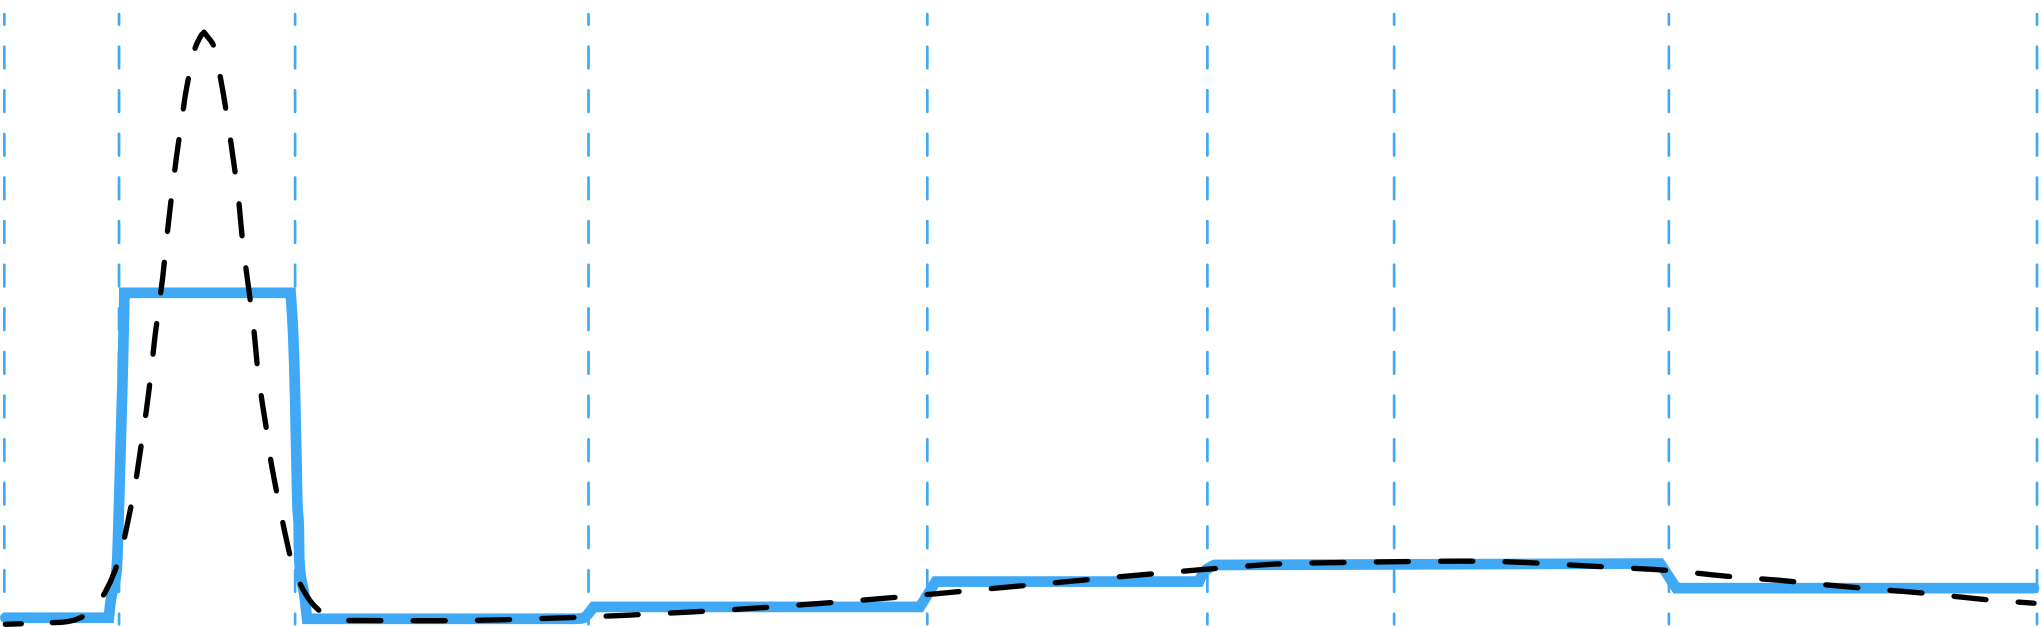

Supplement: supplementary_material [file attachment]
